# Supplementary material for: The Regulatory Network of Sturgeon Chondroitin Sulfate on Colorectal Cancer Inhibition by Transcriptomic and Proteomic Analysis
Source: MDPI journal article supplement (doi:10.3390/ijms22179395), 2021-08-30
Supplement: s1 [file s1]

## Supplementary data

### **The regulatory network of sturgeon chondroitin sulfate on col-orectal cancer inhibition by transcriptomic and proteomic analysis**

Ruiyun Wu <sup>1</sup>, Qian Shen <sup>2</sup>, Guangyue Li <sup>3</sup>, Pinglan Li <sup>1,\*</sup> and Nan Shang <sup>4,\*</sup>

<sup>1</sup> Key Laboratory of Precision Nutrition and Food Quality, Key Laboratory of Functional Dairy, Ministry of Education; College of Food Science and Nutritional Engineering; China Agricultural University, Beijing 100083; wry0814@cau.edu.cn (R.W.); lipinglan@cau.edu.cn (P.L.)

<sup>2</sup> Rhodes College, Department of Biology, 2000 North Pkwy, Memphis, TN 38112; shenq@rhodes.edu

<sup>3</sup> Key Laboratory of Saline-alkali Vegetation Ecology Restoration, Ministry of Education, College of Life Science, Northeast Forestry University, Harbin, 150006; guangyuel@nefu.edu.cn

<sup>4</sup> College of Engineering, China Agricultural University, Beijing 100083; nshang@cau.edu.cn

\* Correspondence: lipinglan@cau.edu.cn (P.L.); nshang@cau.edu.cn (N.S.);

Tel./Fax: +86-010-6273-8678 (P.L.)

**Figure S1.**

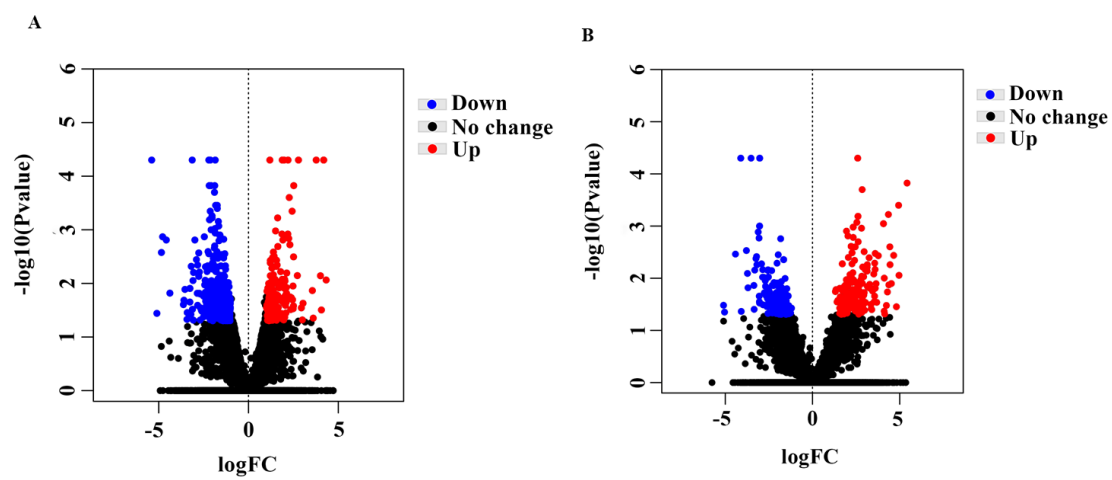

**Figure S1.** Volcano plots in the two datasets. (A) HT-29 cells; (B) NCM460 cells.

Figure S2.

A

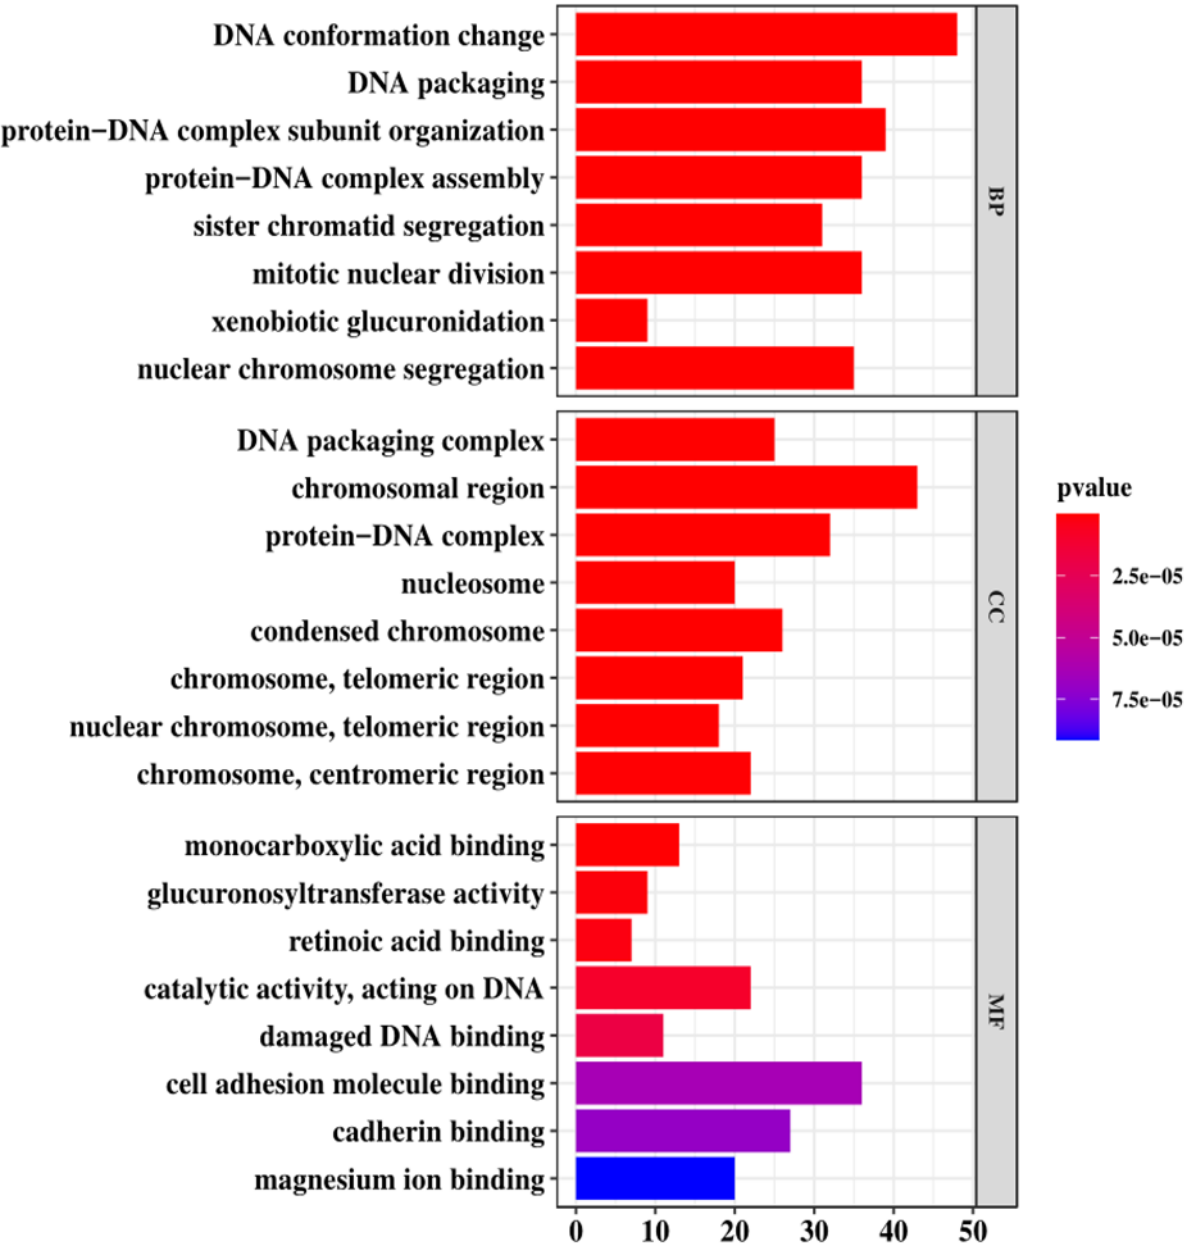

**B**

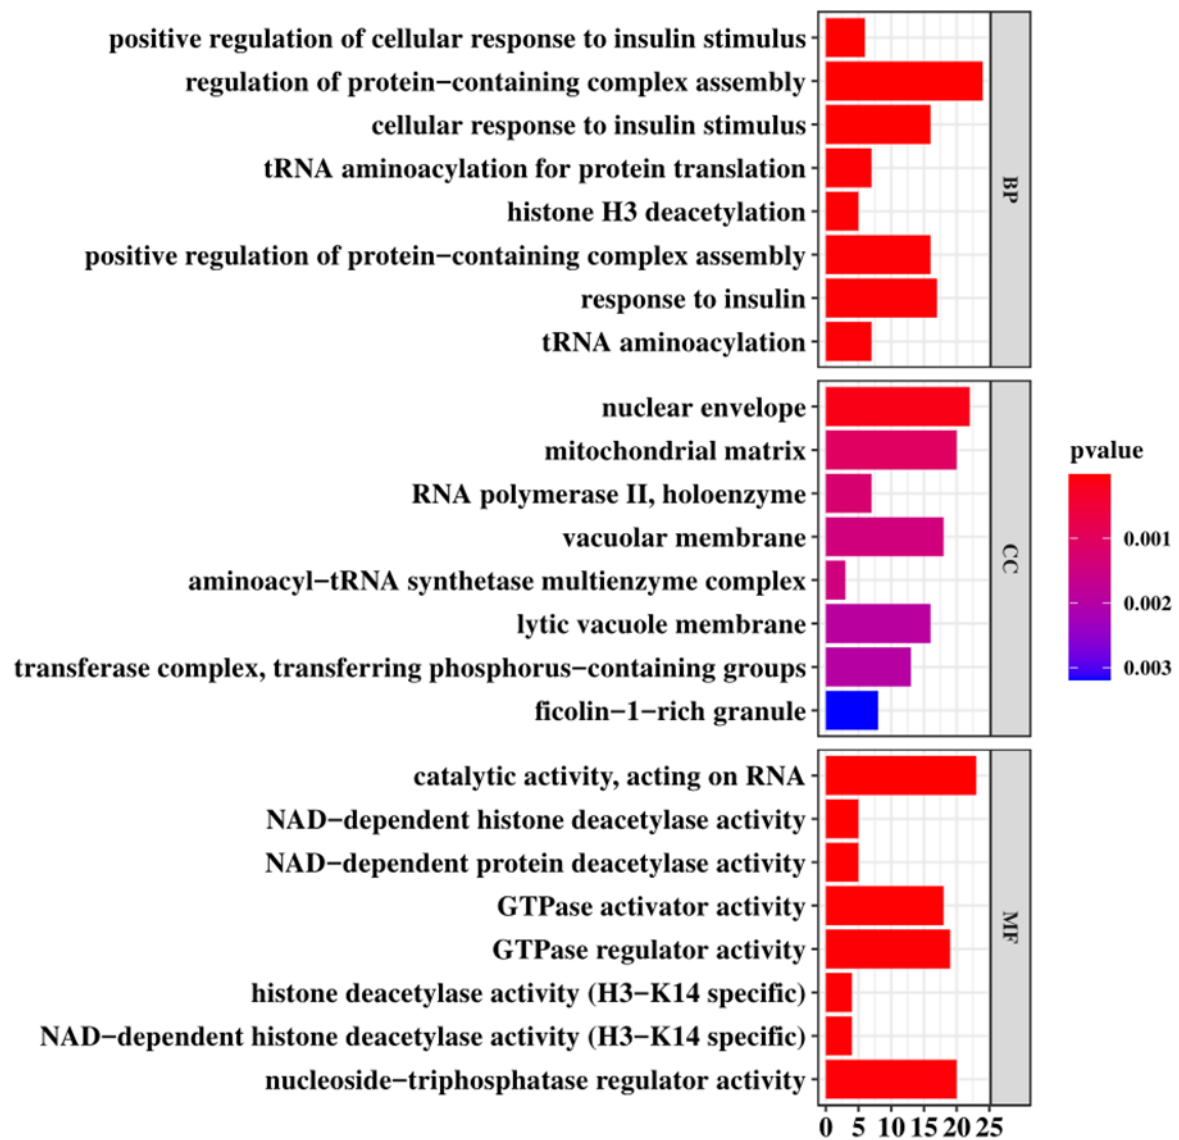

**Figure S2.** The analyses of the genes with reversely changed expression between the two datasets by the GO enrichment analyses. (A) In HT-29 cells treated with SCS; (B) In NCM460 cells treated with SCS.

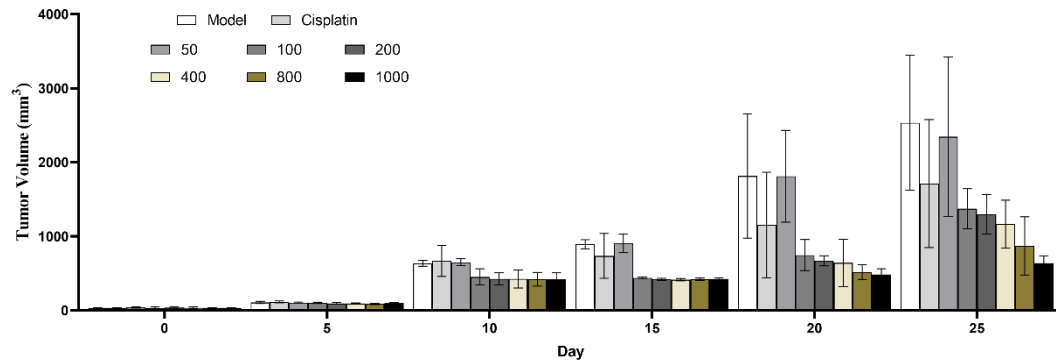

**Figure S3.** Effect of SCS in HT-29 xenograft tumor mice model. Colon cancer HT-29 cells were injected into BALB/c nude mice to develop the CRC model, while the control group was injected with normal saline, positive control group was given cisplatin by gavage, other mice received an intragastric administration of different doses (50, 100, 200, 400, 800 and 1000  $\mu\text{g/g/day}$ ) of SCS (spine) for 25 days.

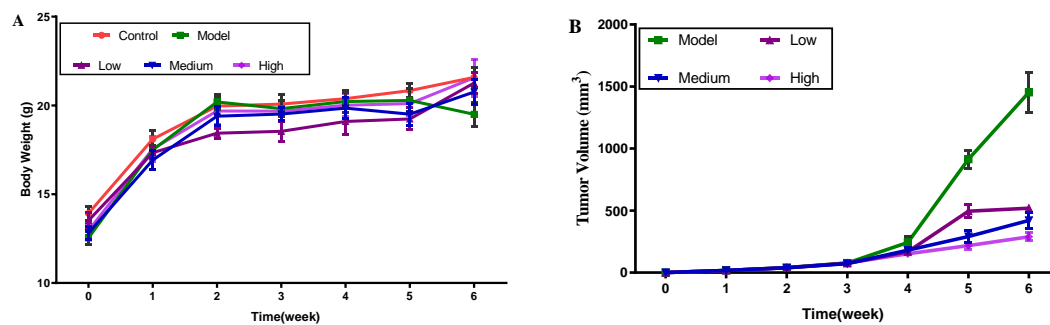

**Figure S4.** Effect of SCS on body weight in HT-29 xenograft tumor mice model. Colon cancer HT-29 cells were injected into BALB/c nude mice to develop the CRC model, while the control group was injected with normal saline. After 3 weeks, mice received an intragastric administration of different doses (100, 200, and 400  $\mu\text{g/g/day}$ ) of SCS (spine) for 4 weeks. (A) body weight, (B) Tumor volume in each time point. All results are expressed as mean  $\pm$  SD (n = 10).

**Table S1.** Genes were up- and down-regulated in the transcriptome of SCS treatment in HT-29 (FoldChange > 1.5,  $P < 0.05$ ).

| Gene_ID         | Gene    | Fold change | Fpkm (HT-29-0) | Fpkm (HT-29-100) | Description             |
|-----------------|---------|-------------|----------------|------------------|-------------------------|
| ENSG00000197150 | ABCB8   | 0.849971    | 6.2411         | 11.2494          | ABC transporters        |
| ENSG00000117528 | ABCD3   | -1.07049    | 18.9982        | 9.04614          | ABC transporters        |
| ENSG00000076555 | ACACB   | -4.84956    | 6.25005        | 0.21678          | Pyruvate metabolism     |
| ENSG00000114331 | ACAP2   | 0.597227    | 9.66951        | 14.6281          | Endocytosis             |
| ENSG00000151726 | ACSL1   | 0.387771    | 11.3748        | 14.8824          | PPAR signaling pathway  |
| ENSG00000131069 | ACSS2   | -0.231053   | 38.87          | 33.1177          | Pyruvate metabolism     |
| ENSG00000170017 | ALCAM   | 1.23344     | 3.46587        | 8.1492           | Cell adhesion molecules |
| ENSG00000137124 | ALDH1B1 | -0.81218    | 6.42896        | 3.66143          | Pyruvate metabolism     |
| ENSG00000143153 | ATP1B1  | -0.807001   | 134.566        | 76.9139          | cAMP signaling pathway  |
| ENSG00000168646 | AXIN2   | -1.16822    | 20.2617        | 9.01586          | Colorectal cancer       |
| ENSG00000105327 | BBC3    | 0.539745    | 15.3826        | 22.3619          | Apoptosis               |

|                 |        |           |         |         |                                         |
|-----------------|--------|-----------|---------|---------|-----------------------------------------|
| ENSG00000089685 | BIRC5  | -0.84584  | 23.1477 | 12.8791 | Apoptosis                               |
| ENSG00000007516 | BAIAP3 | 1.3484    | 2.2313  | 5.68157 | Transcriptional misregulation in cancer |
| ENSG00000125378 | BMP4   | -0.819866 | 126.798 | 71.8305 | Cytokine-cytokine receptor interaction  |
| ENSG00000067191 | CACNB1 | 0.324423  | 1.92517 | 2.41063 | MAPK signaling pathway                  |
| ENSG00000129007 | CALML4 | -0.7125   | 69.6108 | 42.4808 | cAMP signaling pathway                  |
| ENSG00000105974 | CAV1   | -2.61951  | 7.09201 | 1.15403 | Endocytosis                             |
| ENSG00000134057 | CCNB1  | -1.68013  | 49.5962 | 15.4767 | Cell cycle                              |
| ENSG00000112576 | CCND3  | -0.585199 | 24.5289 | 16.3499 | Cell cycle                              |
| ENSG00000105173 | CCNE1  | -0.97821  | 13.0678 | 6.63332 | Cell cycle                              |
| ENSG00000123374 | CDK2   | -1.149    | 19.1165 | 8.62033 | Cell cycle                              |
| ENSG00000124762 | CDKN1A | 1.78979   | 8.10451 | 28.0191 | Colorectal cancer                       |
| ENSG00000109861 | CTSC   | -0.446879 | 54.5608 | 40.0273 | Apoptosis                               |
| ENSG00000103811 | CTSH   | -0.507619 | 96.7967 | 68.0851 | Apoptosis                               |

|                 |        |           |         |         |                            |
|-----------------|--------|-----------|---------|---------|----------------------------|
| ENSG00000135047 | CTSL   | 0.728868  | 2.31248 | 3.83256 | Apoptosis                  |
| ENSG00000101160 | CTSZ   | -0.70697  | 116.913 | 71.6218 | Apoptosis                  |
| ENSG00000134574 | DDB2   | -1.301    | 10.7152 | 4.34871 | p53 signaling pathway      |
| ENSG00000168209 | DDIT4  | 1.53455   | 13.8282 | 40.06   | PI3K-Akt signaling pathway |
| ENSG00000280962 | DUSP16 | -0.318543 | 10.8513 | 8.70145 | MAPK signaling pathway     |
| ENSG00000101412 | E2F1   | -1.74053  | 12.1646 | 3.64036 | Cell cycle                 |
| ENSG00000100664 | EIF5   | 1.37433   | 18.6057 | 48.2347 | RNA transport              |
| ENSG00000049283 | EPN3   | -0.47439  | 16.4876 | 11.8673 | Endocytosis                |
| ENSG00000181104 | F2R    | -0.877261 | 32.0981 | 17.4742 | PI3K-Akt signaling pathway |
| ENSG00000168496 | FEN1   | -2.26945  | 45.3488 | 9.40576 | DNA replication            |
| ENSG00000068078 | FGFR3  | -1.53518  | 5.16782 | 1.78308 | PI3K-Akt signaling pathway |
| ENSG00000160867 | FGFR4  | -1.41976  | 6.2622  | 2.34065 | PI3K-Akt signaling pathway |
| ENSG00000170345 | FOS    | -1.0351   | 202.181 | 98.6609 | Apoptosis                  |



|                  |        |            |         |         |                                        |
|------------------|--------|------------|---------|---------|----------------------------------------|
| ENSG00000001084  | GCLC   | 0.988895   | 28.9117 | 57.3801 | Ferroptosis                            |
| ENSG000000023909 | GCLM   | 0.743281   | 8.6737  | 14.5196 | Ferroptosis                            |
| ENSG000000130513 | GDF15  | 1.50658    | 129.692 | 368.502 | Cytokine-cytokine receptor interaction |
| ENSG000000082516 | GEMIN5 | -0.868009  | 5.60923 | 3.07331 | RNA transport                          |
| ENSG000000127955 | GNAI1  | -1.39683   | 11.6652 | 4.43002 | Rap1 signaling pathway                 |
| ENSG000000106070 | GRB10  | 1.35392    | 6.71316 | 17.1592 | mTOR signaling pathway                 |
| ENSG000000075218 | GTSE1  | -0.848843  | 8.26027 | 4.58635 | p53 signaling pathway                  |
| ENSG000000196917 | HCAR1  | -0.354228  | 14.8297 | 11.6011 | cAMP signaling pathway                 |
| ENSG000000113161 | HMGCR  | -0.595807  | 30.1156 | 19.9267 | AMPK signaling pathway                 |
| ENSG000000142798 | HSPG2  | -0.0932491 | 36.616  | 34.3241 | Focal adhesion                         |
| ENSG000000138413 | IDH1   | 1.07213    | 45.2337 | 95.1055 | Central carbon metabolism in cancer    |
| ENSG000000185885 | IFITM1 | -0.374148  | 76.3839 | 58.9348 | B cell receptor signaling pathway      |
| ENSG000000008517 | IL32   | inf        | 0       | 1.15016 | Cytokine-cytokine receptor interaction |

|                 |          |            |         |         |                            |
|-----------------|----------|------------|---------|---------|----------------------------|
| ENSG00000169047 | IRS1     | -0.232343  | 14.7932 | 12.5927 | PI3K-Akt signaling pathway |
| ENSG00000091136 | LAMB1    | -0.320342  | 14.1754 | 11.3528 | Focal adhesion             |
| ENSG00000130164 | LDLR     | -0.0835284 | 30.7943 | 29.062  | Endocytosis                |
| ENSG00000105486 | LIG1     | -2.02756   | 39.3373 | 9.64822 | DNA replication            |
| ENSG00000113368 | LMNB1    | -2.20548   | 65.7346 | 14.2521 | Apoptosis                  |
| ENSG00000176619 | LMNB2    | -0.395009  | 88.6966 | 67.4524 | Apoptosis                  |
| ENSG00000101577 | LPIN2    | 0.918791   | 14.4732 | 27.3621 | mTOR signaling pathway     |
| ENSG00000164109 | MAD2L1   | -1.36335   | 24.2475 | 9.42451 | Cell cycle                 |
| ENSG00000140941 | MAP1LC3B | 0.86672    | 26.3422 | 48.0354 | Ferroptosis                |
| ENSG00000095015 | MAP3K1   | -1.0113    | 13.9454 | 6.91829 | MAPK signaling pathway     |
| ENSG00000107968 | MAP3K8   | -1.5223    | 15.7494 | 5.48284 | MAPK signaling pathway     |
| ENSG00000188130 | MAPK12   | -0.373649  | 17.7241 | 13.68   | MAPK signaling pathway     |
| ENSG00000073111 | MCM2     | -1.54024   | 46.1521 | 15.8684 | Cell cycle                 |

---

|                 |        |           |         |         |                          |
|-----------------|--------|-----------|---------|---------|--------------------------|
| ENSG00000112118 | MCM3   | -1.83212  | 30.0111 | 8.42866 | Cell cycle               |
| ENSG00000104738 | MCM4   | -1.68884  | 55.6279 | 17.2545 | Cell cycle               |
| ENSG00000100297 | MCM5   | -1.79599  | 29.4571 | 8.48287 | Cell cycle               |
| ENSG00000076003 | MCM6   | -1.93916  | 15.6355 | 4.07726 | Cell cycle               |
| ENSG00000085276 | MECOM  | -0.678179 | 9.34007 | 5.83711 | MAPK signaling pathway   |
| ENSG00000099875 | MKNK2  | 1.52839   | 37.9716 | 109.535 | MAPK signaling pathway   |
| ENSG00000095002 | MSH2   | -0.979808 | 16.243  | 8.23597 | Colorectal cancer        |
| ENSG00000065534 | MYLK   | -1.16018  | 6.26297 | 2.80241 | Apelin signaling pathway |
| ENSG00000155561 | NUP205 | 0.124883  | 17.4242 | 18.9997 | RNA transport            |
| ENSG00000132182 | NUP210 | -0.630834 | 23.6251 | 15.2572 | RNA transport            |
| ENSG00000213024 | NUP62  | -0.82211  | 42.2889 | 23.9192 | RNA transport            |
| ENSG00000143799 | PARP1  | -1.43     | 61.1417 | 22.6916 | Apoptosis                |
| ENSG00000132646 | PCNA   | -1.73915  | 98.694  | 29.5635 | DNA replication          |

---

|                 |         |           |         |         |                            |
|-----------------|---------|-----------|---------|---------|----------------------------|
| ENSG00000145431 | PDGFC   | -1.82629  | 15.0376 | 4.24044 | Rap1 signaling pathway     |
| ENSG00000155629 | PIK3AP1 | -1.43272  | 6.52062 | 2.41544 | PI3K-Akt signaling pathway |
| ENSG00000145675 | PIK3R1  | -0.182374 | 10.5984 | 9.33982 | PI3K-Akt signaling pathway |
| ENSG00000127564 | PKMYT1  | -2.00423  | 16.4128 | 4.0912  | Cell cycle                 |
| ENSG00000105499 | PLA2G4C | 1.95771   | 2.05426 | 7.97971 | Necroptosis                |
| ENSG00000129219 | PLD2    | -0.609837 | 5.8466  | 3.83111 | cAMP signaling pathway     |
| ENSG00000166851 | PLK1    | -0.59503  | 38.7316 | 25.6415 | Cell cycle                 |
| ENSG00000062822 | POLD1   | -1.22843  | 32.7651 | 13.9835 | DNA replication            |
| ENSG00000177084 | POLE    | -1.43174  | 28.457  | 10.5486 | DNA replication            |
| ENSG00000148229 | POLE3   | -1.56145  | 23.1675 | 7.84937 | DNA replication            |
| ENSG00000148737 | TCF7L2  | -0.673697 | 29.4119 | 18.4383 | Adherens junction          |
| ENSG00000160293 | VAV2    | -1.12558  | 26.4165 | 12.1072 | Focal adhesion             |

**Table S2.** Genes were up- and down-regulated in the transcriptome of SCS treatment in NCM460 (FoldChange > 1.5,  $P < 0.01$ ).

| Gene_ID         | Gene  | Fold change | Fpkm (NCM460-0) | Fpkm (NCM460-100) | Description      |
|-----------------|-------|-------------|-----------------|-------------------|------------------|
| ENSG00000117528 | ABCD3 | 2.58858     | 1.53185         | 9.21413           | ABC transporters |
| ENSG00000114331 | ACAP2 | 5.42009     | 0.18855         | 8.07303           | Endocytosis      |
| ENSG00000062822 | POLD1 | -1.81149    | 40.939          | 11.6634           | DNA replication  |
| ENSG00000166851 | PLK1  | -1.67534    | 65.2857         | 20.4405           | Cell cycle       |
| ENSG00000105486 | LIG1  | -1.77395    | 24.4869         | 7.16011           | DNA replication  |

**Table S3.** Effect of SCS on cell apoptosis in HT-29 and NCM460 cells. The apoptosis ratios (%) were calculated by cell apoptosis assay kit and flow cytometer.

|        | Annexin V/PI | Control     | 100 µg/mL   | 200 µg/mL   | 400 µg/mL   |
|--------|--------------|-------------|-------------|-------------|-------------|
| HT-29  | -/-          | 85.69±0.11  | 63.43±2.99  | 50.65±2.33  | 16.61±0.31  |
|        | +/-          | 7.94±0.09   | 23.70±1.54  | 31.08±2.92  | 64.75±2.98  |
|        | +/+          | 6.33±0.18   | 12.85±1.88  | 11.53±1.43  | 18.29±4.04  |
|        | -/+          | 0.037±0.013 | 0.017±0.01  | 0.07±0.04   | 0.35±0.53   |
| NCM460 | -/-          | 88.32±0.26  | 81.00±1.79  | 81.56±6.16  | 75.91±0.59  |
|        | +/-          | 5.48±2.00   | 10.52±0.55  | 13.11±1.08  | 14.68±0.05  |
|        | +/+          | 6.07±0.10   | 8.45±0.94   | 8.36±0.41   | 9.55±0.69   |
|        | -/+          | 0.12±0.18   | 0.027±0.006 | 0.013±0.003 | 0.023±0.007 |

Values are expressed as mean ± SD.

Statistical analysis of differences between groups was performed using one-way ANOVA.
